# Supplementary material for: Influence of Photochemical Loss of VOCs on Understanding Ozone Formation Mechanism
Source: Copernicus journal article supplement (doi:10.5194/acp-2021-814), 2021-10-26
Supplement: Supplementary file 1 [file acp-2021-814-supplement.pdf]

## Supporting information for

# Influence of Photochemical Loss of VOCs on Understanding Ozone Formation Mechanism

Wei Ma<sup>1</sup>, Zemin Feng<sup>1</sup>, Junlei Zhan<sup>1</sup>, Yongchun Liu<sup>1\*</sup>, Pengfei Liu<sup>2,4,5</sup>, Chengtang Liu<sup>2,4,5</sup>, Qingxin Ma<sup>2,4,5</sup>,

Kang Yang<sup>3</sup>, Yafei Wang<sup>3</sup>, Hong He<sup>2,4,5</sup>, Markku Kulmala<sup>1,6</sup>, Yujing Mu<sup>2,4,5</sup>, Junfeng Liu<sup>2,4,5\*</sup>

1. Aerosol and Haze Laboratory, Advanced Innovation Center for Soft Matter Science and Engineering,

Beijing University of Chemical Technology, Beijing, 100029, China

2. Research Center for Eco-Environmental Sciences, Chinese Academy of Sciences, Beijing, 100085, China

3. Beijing Institute of Petrochemical Technology, Beijing 102617, China

4. Center for Excellence in Regional Atmospheric Environment, Institute of Urban Environment, Chinese Academy of Sciences, Xiamen 361021, China

5. University of Chinese Academy of Sciences, Beijing 100049, China

6. Institute for Atmospheric and Earth System Research, Faculty of Science, University of Helsinki, Helsinki, 00014, Finland

\*Corresponding to: Yongchun liu (liuyc@buct.edu.cn) and Junfeng Liu (junfengliu@rcees.ac.cn)

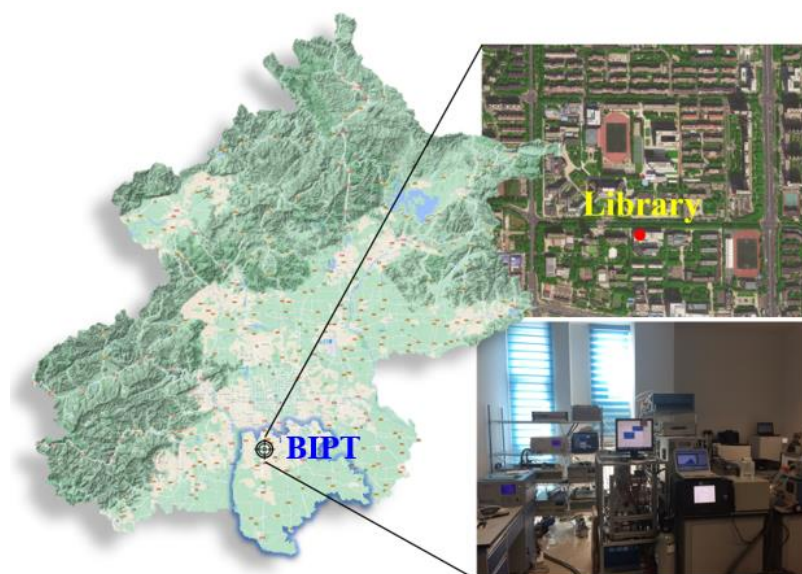

**Figure S1.** Location of the observation station (Zhan et al., 2021). The map is originated from © Google Maps.

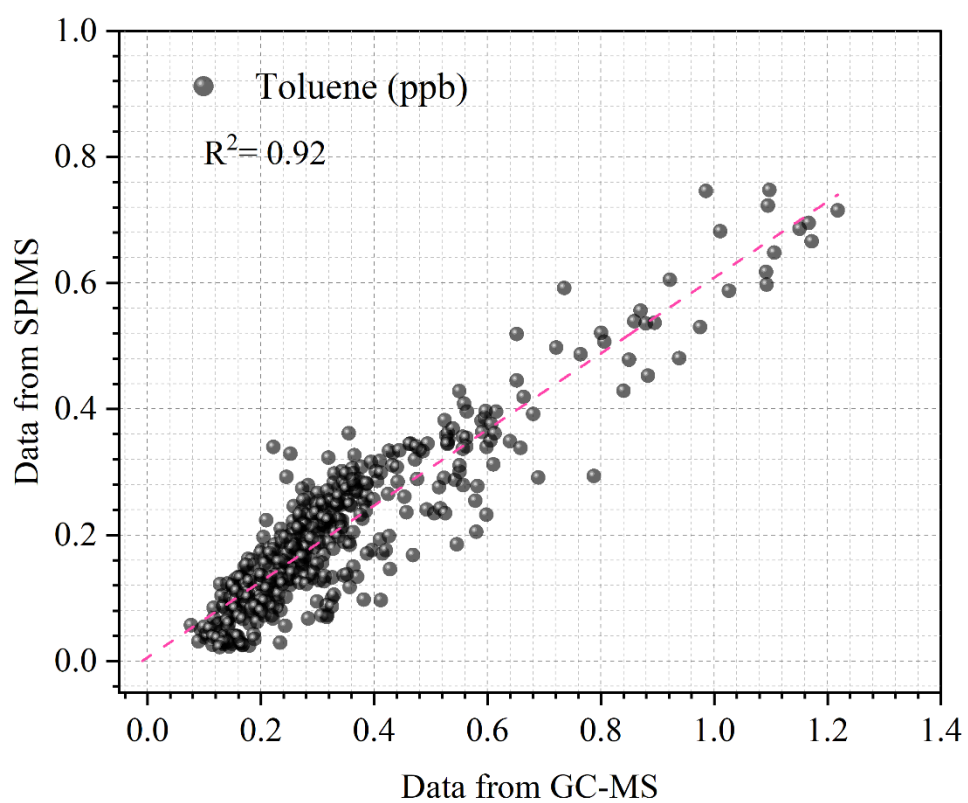

**Figure S2.** The comparison of toluene from SPIMS and GC/FID.

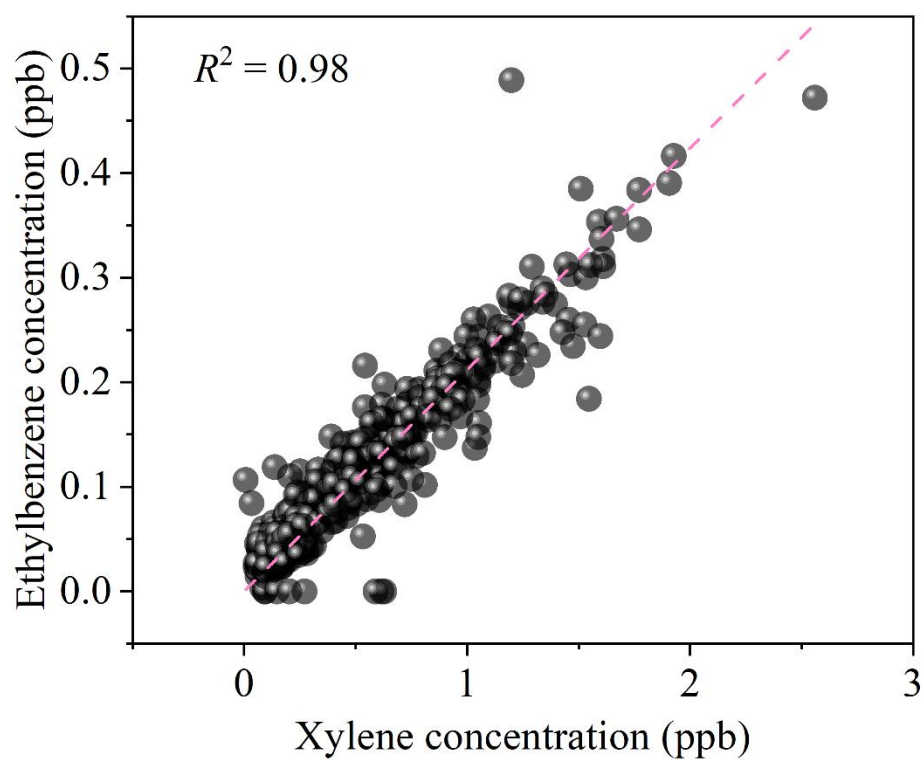

**Figure S3.** The relationship between the concentration of ethylbenzene and xylene.

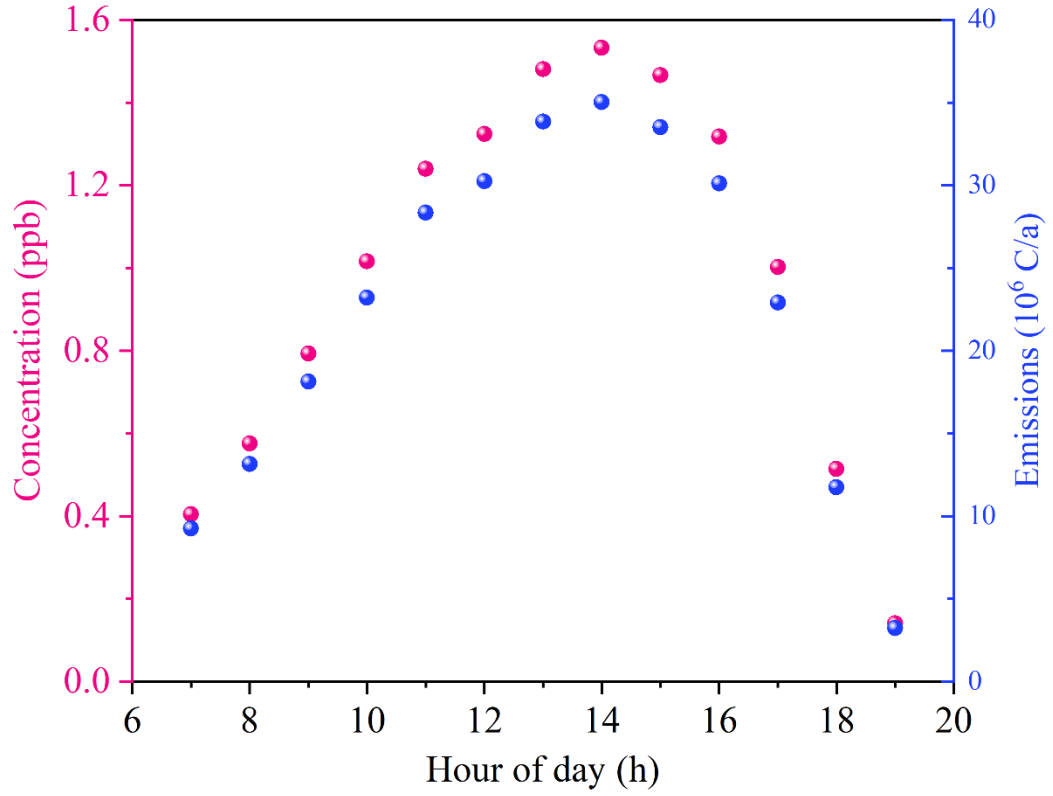

**Figure S4.** The average diurnal variation of isoprene emission.

The volume concentration of isoprene is calculated based on daily emission curve using the Eq. S1,

$$C_{isoprene} = \frac{Emi}{Day \times S \times H} \times \frac{RT}{PM} \quad (S1)$$

where Emi is the emission flux; Day, S and H are the total days of a year, the core urban area of Beijing, and the boundary layer height (~500 m, median of mean diurnal variation), respectively; R, T, P and M are the ideal gas constant, temperature, pressure and the molar molecule mass of isoprene).

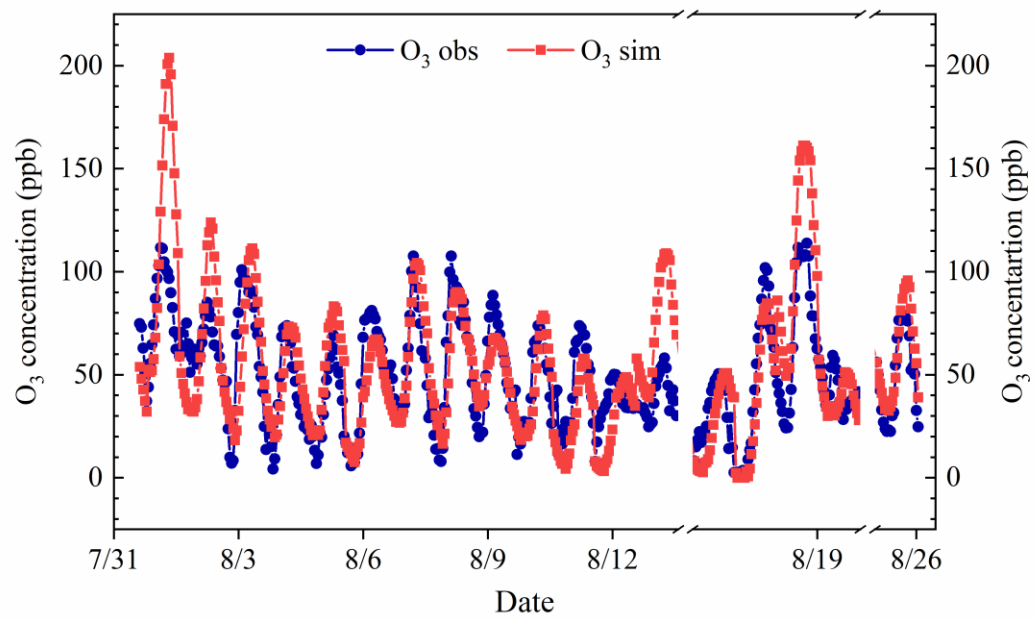

**Figure S5.** The time series of observed and simulated O<sub>3</sub>

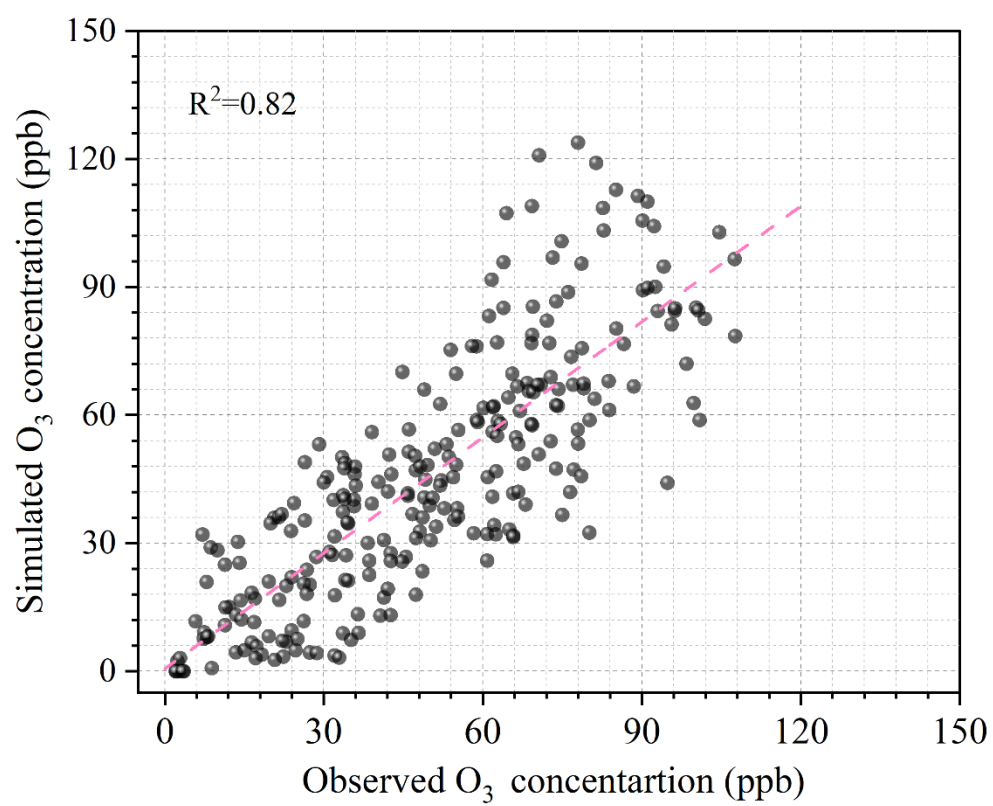

**Figure S6.** The relationship between observed and simulated O<sub>3</sub>.

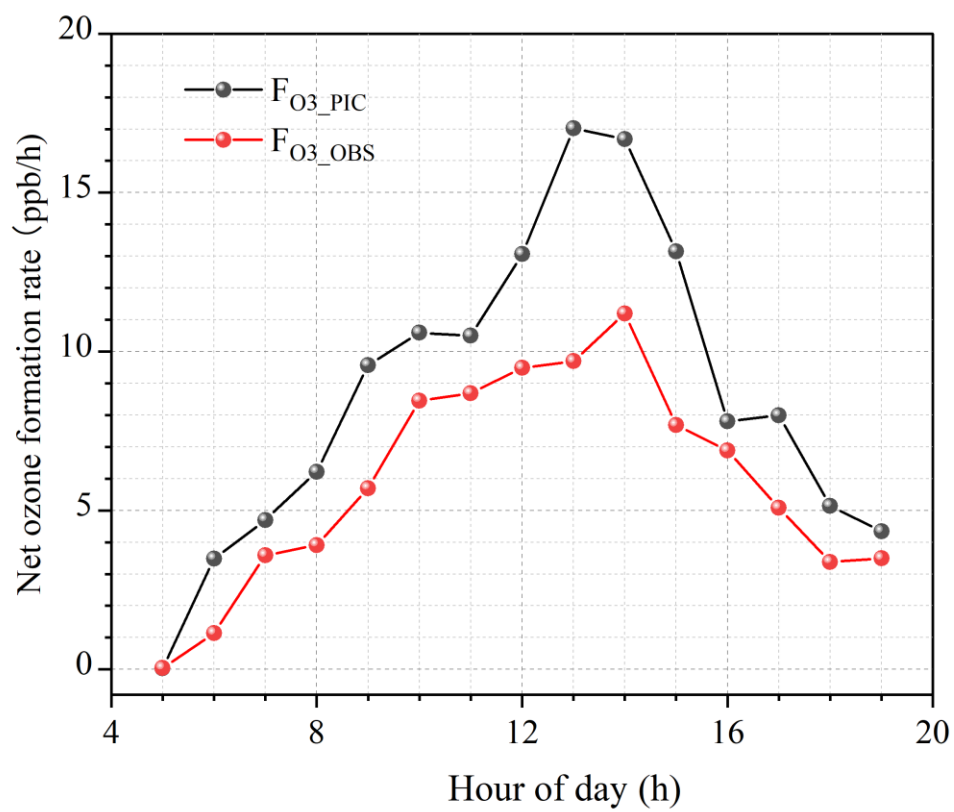

**Figure S7.** The average diurnal variation of F(O<sub>3</sub>).



**Table S1.** Measured parameters for the observation-based model.

| Parameters                                              | Measurement Technique                      | Time Resolution |
|---------------------------------------------------------|--------------------------------------------|-----------------|
| J <sub>NO2</sub>                                        | J <sub>NO2</sub> radiometer, Metcon        | 20 s            |
| O <sub>3</sub> , NO <sub>x</sub> , SO <sub>2</sub> , CO | 42i, 43i, 48i, and 49i, Thermal Scientific | 60 s            |
| HONO                                                    | LOPAP, ICCAS                               | 60 s            |
| Meteorological parameters                               | AWS310, Vaisala                            | 60 s            |
| NMHCs                                                   | GC-FID, RCEES                              | 1 h             |
| Halohydrocarbon                                         | SPIMS., Hexin Instrument Co., Ltd          | 1 h             |
| OVOC                                                    | HPLC, GL Sciences                          | 2 h             |
